# Supplementary material for: Effect of Indoor Forest Bathing on Reducing Feelings of Fatigue Using Cerebral Activity as an Indicator
Source: MDPI journal article supplement (doi:10.3390/ijerph19116672), 2022-05-30
Supplement: s1 [file s1]

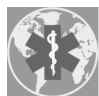

## Supplementary Materials

**Table S1.** Significant correlation between subjective test and near-infrared time-resolved spectroscopy data.

|                               |                  |                  | Affect Grid |          | RAS        |          |           |                     |                                                             |                       | PSS     |                |        |         |        |        |
|-------------------------------|------------------|------------------|-------------|----------|------------|----------|-----------|---------------------|-------------------------------------------------------------|-----------------------|---------|----------------|--------|---------|--------|--------|
|                               |                  |                  | Pleasant    | Arousing | Sleepiness | Unactive | Unrelaxed | Strain<br>(tension) | Difficulty<br>maintaining<br>attention and<br>concentration | Lack of<br>motivation | Malaise | Unplea<br>sant | Angry  | Anxiety | Stress | Strain |
| 0-1<br>min<br>mean            | tHb              | L                | 0.306       | 0.255    | −0.142     | 0.359    | −0.448    | −0.072              | 0.279                                                       | −0.304                | −0.210  | −0.513         | 0.218  | 0.191   | −0.334 | −0.243 |
|                               |                  | R                | −0.227      | −0.319   | 0.105      | −0.572   | 0.334     | 0.073               | −0.300                                                      | 0.571                 | 0.451   | 0.412          | 0.021  | 0.354   | 0.382  | 0.602  |
|                               | oxy-Hb           | L                | 0.221       | 0.059    | −0.184     | 0.059    | −0.444    | 0.193               | −0.001                                                      | −0.177                | −0.097  | −0.411         | 0.239  | −0.060  | −0.034 | 0.074  |
|                               |                  | R                | −0.580      | −0.094   | 0.000      | −0.461   | 0.494     | 0.363               | −0.427                                                      | 0.323                 | 0.610   | 0.531          | 0.208  | 0.184   | 0.328  | 0.681  |
|                               | deoxy-Hb         | L                | 0.231       | 0.335    | −0.021     | 0.472    | −0.195    | −0.326              | 0.419                                                       | −0.278                | −0.224  | −0.333         | 0.065  | 0.369   | −0.479 | −0.463 |
|                               |                  | R                | 0.432       | −0.410   | 0.182      | −0.300   | −0.134    | −0.391              | 0.103                                                       | 0.501                 | −0.105  | −0.057         | −0.265 | 0.320   | 0.172  | 0.043  |
|                               | StO <sub>2</sub> | L                | −0.105      | −0.244   | −0.104     | −0.389   | −0.060    | 0.390               | −0.364                                                      | 0.155                 | 0.173   | 0.042          | 0.111  | −0.328  | 0.402  | 0.461  |
|                               |                  | R                | −0.619      | 0.236    | −0.152     | −0.135   | 0.325     | 0.483               | −0.373                                                      | −0.139                | 0.399   | 0.280          | 0.267  | −0.180  | 0.076  | 0.377  |
| 0-5<br>min<br>slope           | tHb              | L                | −0.424      | −0.363   | 0.176      | 0.033    | 0.369     | 0.312               | −0.190                                                      | 0.014                 | 0.194   | 0.463          | −0.097 | −0.597  | 0.218  | 0.208  |
|                               |                  | R                | 0.007       | −0.490   | 0.522      | 0.412    | −0.015    | −0.349              | 0.389                                                       | 0.279                 | −0.202  | −0.041         | −0.616 | −0.867  | −0.064 | −0.269 |
|                               | oxy-Hb           | L                | −0.300      | −0.416   | 0.193      | −0.097   | 0.299     | 0.323               | −0.183                                                      | 0.115                 | 0.179   | 0.430          | −0.096 | −0.479  | 0.343  | 0.308  |
|                               |                  | R                | 0.220       | −0.162   | 0.130      | 0.231    | −0.269    | −0.227              | 0.203                                                       | 0.078                 | −0.309  | −0.260         | −0.352 | −0.714  | 0.035  | −0.310 |
|                               | deoxy-Hb         | L                | −0.281      | 0.357    | −0.119     | 0.479    | 0.100     | −0.174              | 0.074                                                       | −0.359                | −0.021  | −0.071         | 0.027  | −0.200  | −0.536 | −0.448 |
|                               |                  | R                | −0.371      | −0.297   | 0.389      | 0.078    | 0.448     | −0.023              | 0.102                                                       | 0.195                 | 0.291   | 0.398          | −0.124 | 0.209   | −0.138 | 0.214  |
|                               | StO <sub>2</sub> | L                | −0.143      | −0.461   | 0.198      | −0.289   | 0.252     | 0.288               | −0.141                                                      | 0.288                 | 0.193   | 0.382          | −0.061 | −0.234  | 0.532  | 0.436  |
|                               |                  | R                | 0.287       | 0.072    | −0.086     | 0.200    | −0.354    | −0.103              | 0.133                                                       | −0.081                | −0.297  | −0.305         | −0.104 | −0.496  | 0.075  | −0.290 |
| R / L ratio<br>(0-1 min mean) |                  | tHb              | −0.281      | −0.383   | 0.153      | −0.571   | 0.436     | 0.065               | −0.305                                                      | 0.581                 | 0.402   | 0.498          | −0.104 | 0.101   | 0.479  | 0.531  |
|                               |                  | oxy-Hb           | −0.509      | −0.213   | 0.140      | −0.472   | 0.595     | 0.146               | −0.324                                                      | 0.460                 | 0.517   | 0.611          | −0.021 | 0.151   | 0.361  | 0.541  |
|                               |                  | deoxy-Hb         | 0.075       | −0.464   | 0.107      | −0.527   | 0.127     | −0.073              | −0.192                                                      | 0.555                 | 0.142   | 0.204          | −0.172 | 0.012   | 0.478  | 0.341  |
|                               |                  | StO <sub>2</sub> | −0.492      | 0.372    | −0.080     | 0.157    | 0.356     | 0.143               | −0.070                                                      | −0.234                | 0.245   | 0.213          | 0.179  | 0.068   | −0.208 | −0.002 |
| ΔRL<br>(0-1 min mean)         |                  | tHb              | −0.318      | −0.386   | 0.150      | −0.548   | 0.467     | 0.091               | −0.330                                                      | 0.538                 | 0.416   | 0.540          | −0.089 | 0.106   | 0.441  | 0.527  |
|                               |                  | oxy-Hb           | −0.588      | −0.162   | 0.116      | −0.391   | 0.658     | 0.176               | −0.324                                                      | 0.373                 | 0.550   | 0.658          | 0.037  | 0.164   | 0.299  | 0.507  |
|                               |                  | deoxy-Hb         | 0.135       | −0.483   | 0.133      | −0.476   | 0.038     | −0.054              | −0.183                                                      | 0.497                 | 0.075   | 0.166          | −0.205 | −0.019  | 0.406  | 0.313  |
|                               |                  | StO <sub>2</sub> | −0.504      | 0.363    | −0.058     | 0.161    | 0.358     | 0.164               | −0.073                                                      | −0.228                | 0.257   | 0.235          | 0.174  | 0.067   | −0.209 | 0.024  |

Bold and gray hatch:  $|r| > 0.5$  and  $p < 0.05$ .

RAS, Roken Arousal Scale; PSS, Phasic Stress Scale; Hb, hemoglobin; oxy-Hb, oxygenated hemoglobin; deoxy-Hb, deoxygenated hemoglobin; tHb, total hemoglobin; StO<sub>2</sub>, tissue oxygen saturation; R, right; L, left; R/L ratio, right-left ratio;  $\Delta$ RL, right-left difference.

**Table S2.** Correlation analysis of the visual analog scale value of the feeling of fatigue and another subjective test after the fatigue-inducing task.

|             |                                                    | Correlation coefficient (r) | <i>p</i> -value | Significance level |
|-------------|----------------------------------------------------|-----------------------------|-----------------|--------------------|
| Affect Grid | Pleasant                                           | −0.566                      | 0.088           | †                  |
|             | Arousing                                           | −0.261                      | 0.466           | NS                 |
| RAS         | Sleepiness                                         | 0.049                       | 0.892           | NS                 |
|             | Unactive                                           | −0.306                      | 0.390           | NS                 |
|             | Unrelaxed                                          | 0.724                       | 0.018           | *                  |
|             | Strain (tension)                                   | 0.461                       | 0.180           | NS                 |
|             | Difficulty maintaining attention and concentration | −0.116                      | 0.749           | NS                 |
|             | Lack of motivation                                 | 0.395                       | 0.259           | NS                 |
| PSS         | Malaise                                            | 0.788                       | 0.007           | **                 |
|             | Unpleasant                                         | 0.719                       | 0.019           | *                  |
|             | Angry                                              | 0.533                       | 0.113           | NS                 |
|             | Anxiety                                            | 0.419                       | 0.229           | NS                 |
|             | Stress                                             | 0.757                       | 0.011           | *                  |
|             | Strain                                             | 0.822                       | 0.004           | **                 |

†  $p < 0.1$ , \*  $p < 0.05$ , \*\*  $p < 0.01$ .

NS, not significant; RAS, Roken Arousal Scale; PSS, Phasic Stress Scale.

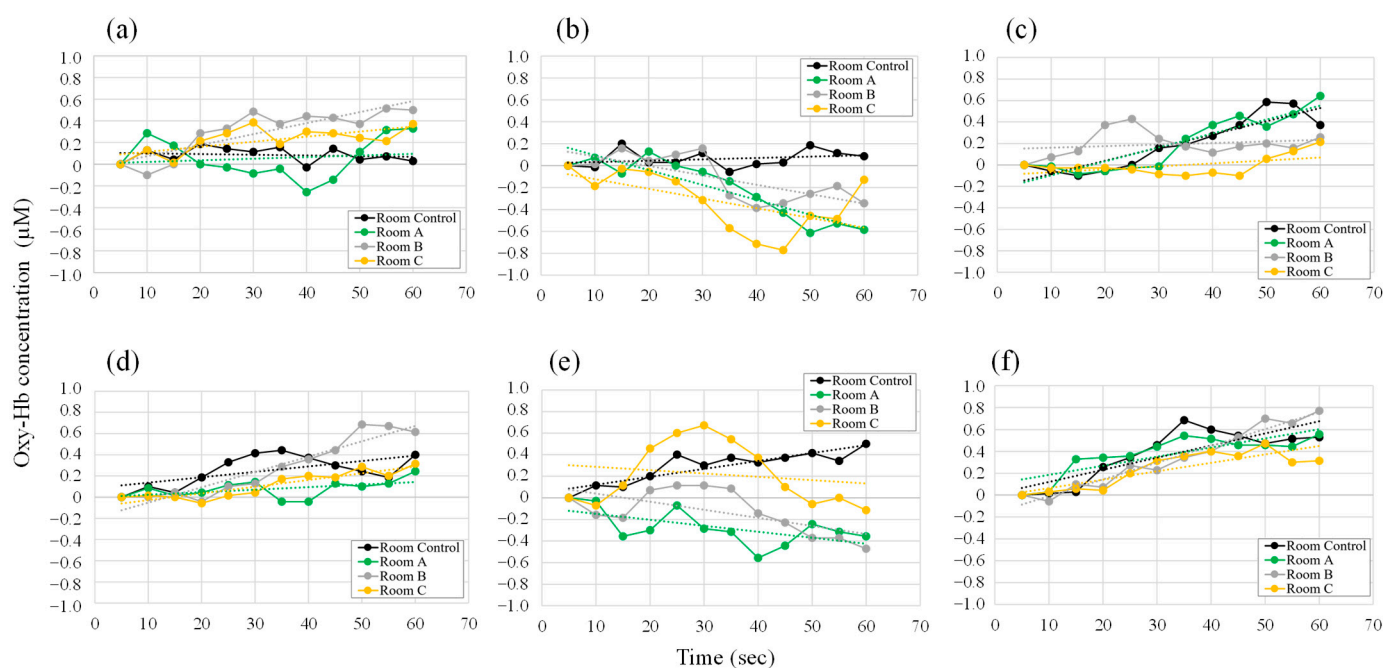**Figure S1.** The slope in the oxygenated hemoglobin concentration in the prefrontal cortex during the experiment, every 5 s over a 60-s period. The vertical axis shows the difference value from the first 5 s. (a–c) Right prefrontal cortex, (d–f) left prefrontal cortex, (a and d) rest 1, (b and e) GT, and

**(c and f)** rest 2. Data are expressed as means ( $n = 7$ ). Oxy-Hb, oxygenated hemoglobin; Room Control, space without natural green features; Room A/B/C, space with natural green features.
